# Supplementary material for: Enhancement of sludge electro-dewaterability during biological conditioning
Source: Royal Society of Chemistry journal article supplement (doi:10.1039/c9ra09126b), 2020-01-01
Supplement: c9ra09126b1.pdf [file c9ra09126b1.pdf]

**Supplementary Material**

**Enhancement of sludge electro-dewaterability during  
biological conditioning**

Yingte Li<sup>a</sup>, Yong Liu<sup>a</sup>, Xiaoyan Yu<sup>b</sup>, Qian Li<sup>a</sup>, Rui Zhang<sup>c</sup>, Shuting Zhang<sup>a, \*</sup>

<sup>a</sup>*School of Environmental Science and Engineering, Tianjin University, Tianjin 300354, China*

<sup>b</sup>*School of Energy and Chemical Engineering, Liaoning Technical University, Hu Ludao 125105, China*

<sup>c</sup>*School of Energy and Safety Engineering, Tianjin Chengjian University, Tianjin 300384, China*

*\*Corresponding author: Shuting Zhang*

*E-mail: zhangst@tju.edu.cn*

*Telephone: +86-22-87402148*

Table S1

Summary of principal component regression.

|           | Estimate | Std. error | t value | Pr(> t ) |     |
|-----------|----------|------------|---------|----------|-----|
| Intercept | 44.7991  | 0.3421     | 130.956 | <2E-16   | *** |
| $Z_1^*$   | -1.8068  | 0.1801     | -10.033 | 7.15E-07 | *** |
| $Z_2^*$   | -1.7402  | 0.3204     | -5.431  | 0.000207 | *** |

\*: Signif. codes: 0 '\*\*\*' 0.001 '\*\*' 0.01 '\*' 0.05 '.' 0.1 ' ' 1

Residual standard error: 1.28 on 11 degrees of freedom; Multiple R-squared: 0.9221,

Adjusted R-squared: 0.9079; F-statistic: 65.08 on 2 and 11 DF, p-value: 8.02E-07

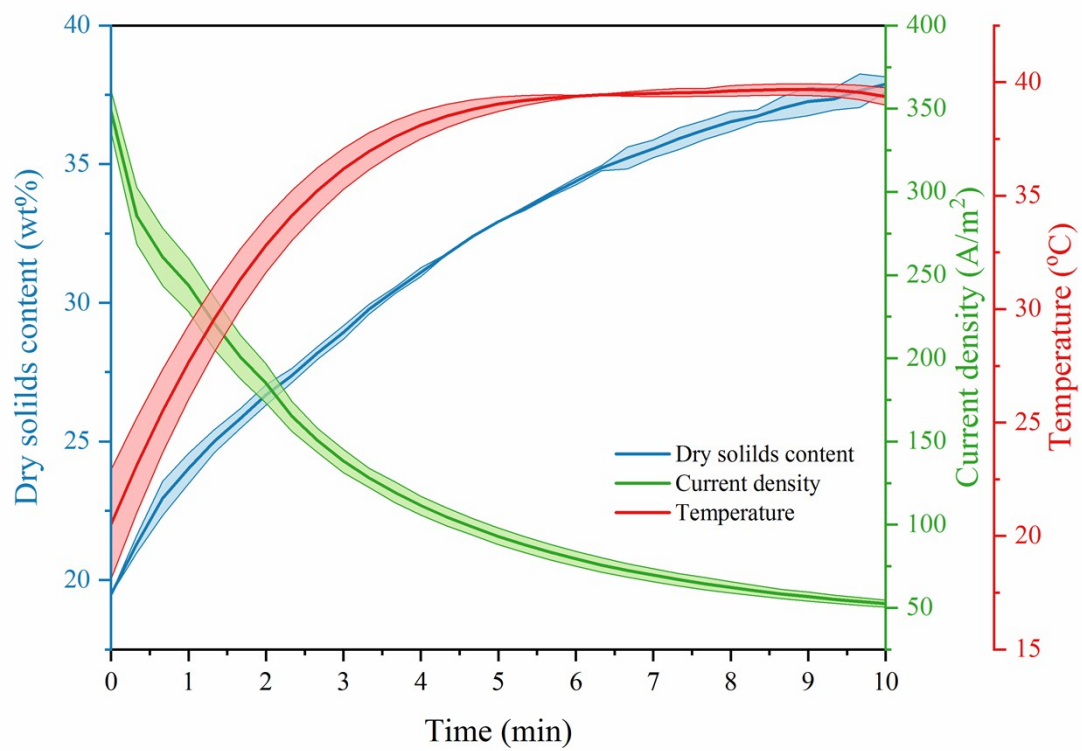

Fig. S1 Repeatability of EDW of raw sludge.
